# Supplementary material for: Metal–organic framework-based fluorescent sensing of tetracycline-type antibiotics applicable to environmental and food analysis
Source: Royal Society of Chemistry journal article supplement (doi:10.1039/c8an01895b), 2019-01-01
Supplement: c8an01895b1.pdf [file c8an01895b1.pdf]

## **Electronic Supplementary Information**

### **Metal-organic framework based fluorescent sensing of tetracycline type antibiotics applicable to environmental and food analysis**

Qiao Liu,<sup>‡</sup> Di Ning,<sup>‡</sup> Wen-Juan Li, Xiao-Meng Du, Qian Wang, Yue Li,<sup>\*</sup> and Wen-Juan Ruan<sup>\*</sup>

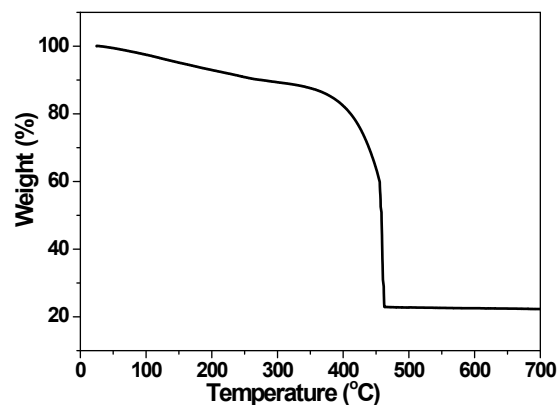

**Fig. S1** Thermogravimetric curve of as-prepared In-sbdc. The overall weight loss from room temperature to 700 °C was 77.51%, which is in good consistence with the calculated value of 77.70% for the removal of all lattice H<sub>2</sub>O molecules and organic components based on the formula of [In<sub>2</sub>(sbdc)<sub>3</sub>(H<sub>2</sub>O)<sub>4</sub>](H<sub>2</sub>O)<sub>8</sub>.

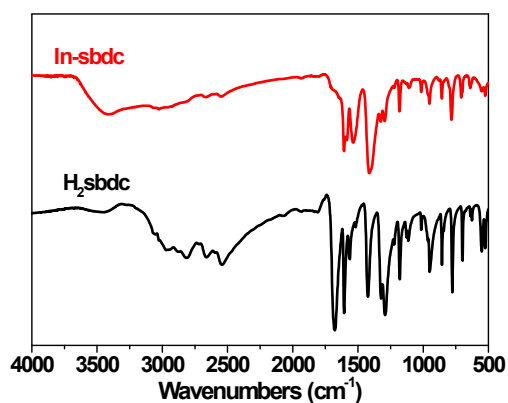

**Fig. S2** FT-IR spectra of In-sbdc and free H<sub>2</sub>sbdc ligand. In the spectrum of In-sbdc, the peaks corresponding to the stretching vibration of carboxyl groups appeared at 1606 and 1410 cm<sup>-1</sup>, indicating that the H<sub>2</sub>sbdc ligand is completely deprotonated upon the formation of MOF structure.

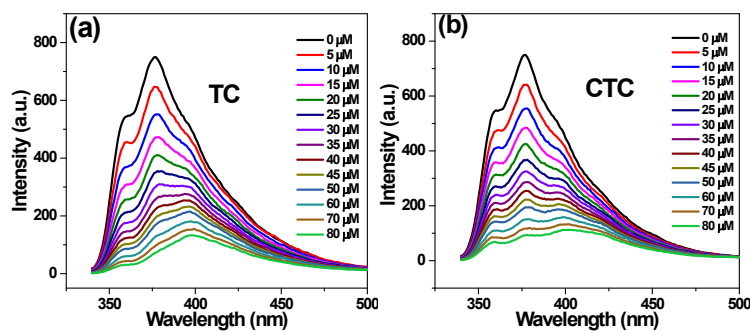

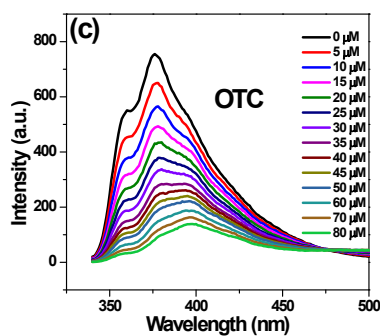

**Fig. S3** Fluorescent spectra of the suspension of In-sbdc (15 mg L<sup>-1</sup>) after the addition of different concentrations of (a) TC, (b) CTC and (c) OTC.

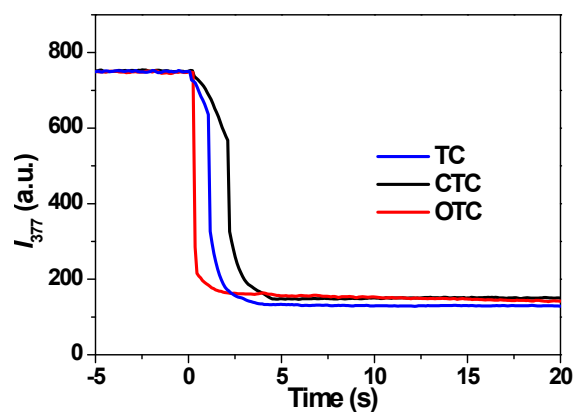

**Fig. S4** Fluorescent intensity change of In-sbdc suspension after the addition of TC antibiotics. 15 mg L<sup>-1</sup> In-sbdc, 60 μM TC antibiotics.

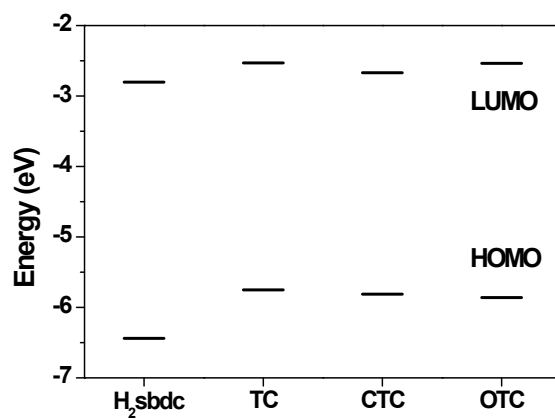

**Fig. S5** Frontier orbital levels of TC antibiotics and H<sub>2</sub>sbdc ligand, calculated at B3LYP/6-311++G(2df,2p)//B3LYP/6-31+G(d) level.

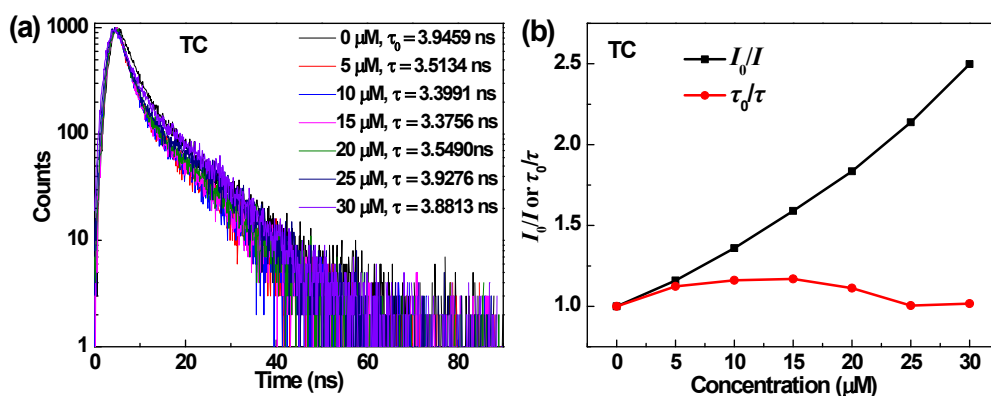

Fig. S6 (a) Fluorescence decay transients of In-sbdc suspension with different concentrations of TC. (b) Steady-state ( $I_0/I$ ) and time-resolved ( $\tau_0/\tau$ ) Stern-Volmer plots of TC.

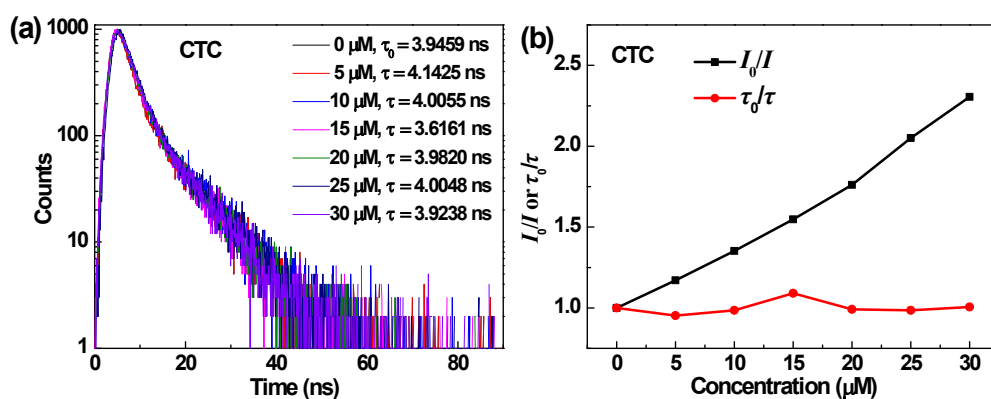

Fig. S7 (a) Fluorescence decay transients of In-sbdc suspension with different concentrations of CTC. (b) Steady-state ( $I_0/I$ ) and time-resolved ( $\tau_0/\tau$ ) Stern-Volmer plots of CTC.

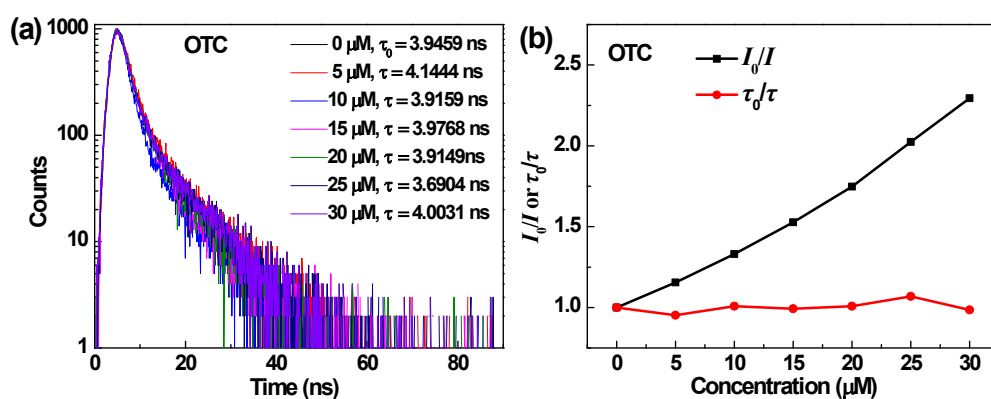

Fig. S8 (a) Fluorescence decay transients of In-sbdc suspension with different concentrations of OTC. (b) Steady-state ( $I_0/I$ ) and time-resolved ( $\tau_0/\tau$ ) Stern-Volmer plots of OTC.

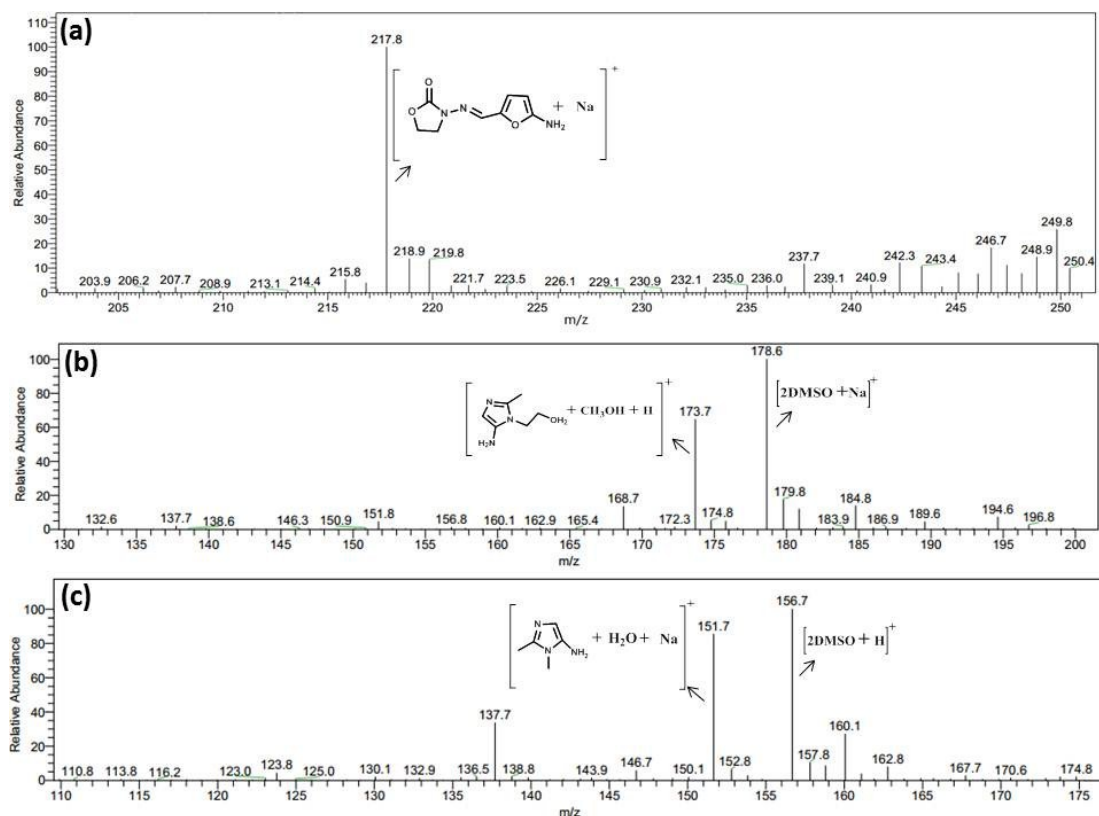

**Fig. S9** ESI-MS spectra of the reduction products of (a) FZD, (b) MNZ and (c) DMZ. To enhance the solubility of reactants, the reactions were carried out in DMSO. Methanol was used as the mobile phase in ESI-MS measurement.

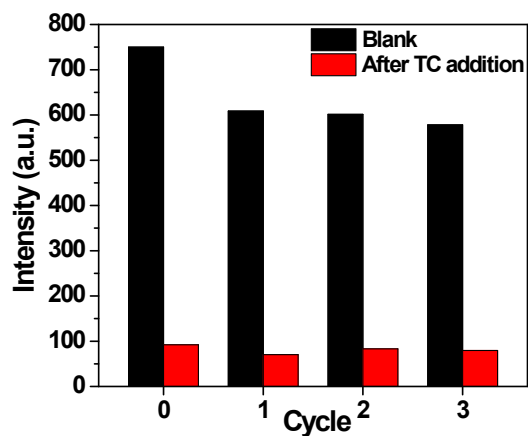

**Fig. S10** Fluorescent responses of In-sbdc to TC (80  $\mu$ M) in four consecutive cycles.

**Table S1** Selectivity of reported MOF based sensing systems for antibiotics

| Entry | Analyte                            | Response induced by other antibiotic                                                                                  |  | Ref.      |
|-------|------------------------------------|-----------------------------------------------------------------------------------------------------------------------|--|-----------|
|       |                                    | $\frac{\text{Response induced by other antibiotic}}{\text{Response induced by equal amount of analyte}} \times 100\%$ |  |           |
| 1     | Nitrofurazone, nitrofurantoin      | 5 – 72%                                                                                                               |  | 1         |
| 2     | Nitrofurazone, nitrofurantoin      | 8 – 15%                                                                                                               |  | 2         |
| 3     | Nitrofurazone, nitrofurantoin      | 10 – 18%                                                                                                              |  | 3         |
| 4     | Nitrofurazone, nitrofurantoin, FZD | 21 – 84%                                                                                                              |  | 4         |
| 5     | Ronidazole                         | 5 – 20%                                                                                                               |  | 5         |
| 6     | Ornidazole                         | 5 – 14%                                                                                                               |  | 6         |
| 7     | Cefixime                           | 3 – 20%                                                                                                               |  | 7         |
| 8     | TC                                 | 10 – 17%                                                                                                              |  | 8         |
| 9     | TC, CTC, OTC                       | 0 – 10%                                                                                                               |  | This work |

**Table S2** Analytical results of TCs in pure milk<sup>a</sup>

| Antibiotic | Spiked ( $\mu\text{M}$ ) | Found ( $\mu\text{M}$ ) | Recovery (%) |
|------------|--------------------------|-------------------------|--------------|
| TC         | 0                        | –                       | –            |
|            | 5                        | 4.894±0.071             | 97.88        |
|            | 10                       | 9.972±0.205             | 101.56       |
|            | 15                       | 14.906±0.109            | 98.69        |
|            | 20                       | 19.986±0.184            | 101.60       |
| CTC        | 0                        | –                       | –            |
|            | 5                        | 5.072±0.255             | 101.44       |
|            | 10                       | 10.043±0.544            | 99.42        |
|            | 15                       | 14.934±0.241            | 97.81        |
|            | 20                       | 20.062±0.059            | 102.57       |
| OTC        | 0                        | –                       | –            |
|            | 5                        | 5.078±0.074             | 101.56       |
|            | 10                       | 10.009±0.184            | 98.62        |
|            | 15                       | 15.044±0.152            | 100.70       |
|            | 20                       | 20.133±0.0482           | 101.77       |

<sup>a</sup> The milk sample was diluted with Bis-Tris-HCl buffer by  $3 \times 10^3$  times before measurement.

**Table S3** Analytical results of TCs in pork<sup>a</sup>

| Antibiotic | Spiked ( $\mu\text{M}$ ) | Found ( $\mu\text{M}$ ) | Recovery (%) |
|------------|--------------------------|-------------------------|--------------|
| TC         | 0                        | –                       | –            |
|            | 5                        | 5.005 $\pm$ 0.032       | 100.11       |
|            | 10                       | 9.954 $\pm$ 0.058       | 98.97        |
|            | 15                       | 14.929 $\pm$ 0.090      | 99.49        |
|            | 20                       | 19.967 $\pm$ 0.196      | 100.77       |
| CTC        | 0                        | –                       | –            |
|            | 5                        | 4.954 $\pm$ 0.029       | 99.08        |
|            | 10                       | 10.070 $\pm$ 0.184      | 102.33       |
|            | 15                       | 15.074 $\pm$ 0.387      | 100.06       |
|            | 20                       | 20.009 $\pm$ 0.094      | 98.71        |
| OTC        | 0                        | –                       | –            |
|            | 5                        | 5.080 $\pm$ 0.082       | 101.60       |
|            | 10                       | 10.021 $\pm$ 0.182      | 98.82        |
|            | 15                       | 15.149 $\pm$ 0.114      | 102.56       |
|            | 20                       | 20.109 $\pm$ 0.034      | 99.20        |

<sup>a</sup> 1 g of pork sample was ground and extracted with 5 mL acetonitrile. The extraction was filtered and diluted with Bis-Tris-HCl buffer by  $3\times 10^3$  times before measurement.

**Table S4** Analytical results of TCs in fish<sup>a</sup>

| Antibiotic | Spiked ( $\mu\text{M}$ ) | Found ( $\mu\text{M}$ ) | Recovery (%) |
|------------|--------------------------|-------------------------|--------------|
| TC         | 0                        | –                       | –            |
|            | 5                        | 4.946 $\pm$ 0.081       | 98.92        |
|            | 10                       | 9.934 $\pm$ 0.186       | 99.76        |
|            | 15                       | 14.948 $\pm$ 0.068      | 100.28       |
|            | 20                       | 19.930 $\pm$ 0.105      | 99.94        |
| CTC        | 0                        | –                       | –            |
|            | 5                        | 4.977 $\pm$ 0.189       | 99.53        |
|            | 10                       | 10.098 $\pm$ 0.272      | 102.43       |
|            | 15                       | 15.070 $\pm$ 0.157      | 99.44        |
|            | 20                       | 19.932 $\pm$ 0.391      | 97.25        |
| OTC        | 0                        | –                       | –            |
|            | 5                        | 5.086 $\pm$ 0.057       | 101.72       |
|            | 10                       | 10.210 $\pm$ 0.231      | 102.48       |
|            | 15                       | 15.028 $\pm$ 0.199      | 96.35        |
|            | 20                       | 20.137 $\pm$ 0.054      | 102.18       |

<sup>a</sup> 1 g of fish sample was ground and extracted with 5 mL acetonitrile. The extraction was filtered and diluted with Bis-Tris-HCl buffer by  $3\times 10^3$  times before measurement.

## References

- 1 B. Wang, X. L. Lv, D. Feng, L. H. Xie, J. Zhang, M. Li, Y. Xie, J. R. Li and H. C. Zhou, *J. Am. Chem. Soc.*, 2016, **138**, 6204–6216.
- 2 F. Zhang, H. Yao, Y. Zhao, X. Li, G. Zhang and Y. Yang, *Talanta*, 2017, **174**, 660–666.
- 3 F. Zhang, H. Yao, T. Chu, G. Zhang, Y. Wang and Y. Yang, *Chemistry*, 2017, **23**, 10293–10300.
- 4 H.-R. Fu, L.-B. Yan, N.-T. Wu, L.-F. Ma and S.-Q. Zang, *J. Mater. Chem. A*, 2018, **6**, 9183–9191.
- 5 Q. Zhang, M. Lei, H. Yan, J. Wang and Y. Shi, *Inorg. Chem.*, 2017, **56**, 7610–7614.
- 6 M.-L. Han, G.-X. Wen, W.-W. Dong, Z.-H. Zhou, Y.-P. Wu, J. Zhao, D.-S. Li, L.-F. Ma and X. Bu, *J. Mater. Chem. C*, 2017, **5**, 8469–8474.
- 7 H. Pan, S. Wang, X. Dao and Y. Ni, *Inorg. Chem.*, 2018, **57**, 1417–1425.
- 8 Y. Zhou, Q. Yang, D. Zhang, N. Gan, Q. Li and J. Cuan, *Sens. Actuators B: Chem.*, 2018, **262**, 137–143.
